# Supplementary material for: A map of human protein interactions derived from co-expression of human mRNAs and their orthologs
Source: PubMed Central journal article supplement — Mol Syst Biol. 2008 Apr 15;4:180. doi: 10.1038/msb.2008.19 (PMC2387231; doi:10.1038/msb.2008.19), 2008-04-15

**Supplemental Figure 1.** Analysis of conserved co-expression using data from human microarray experiments and four other organisms ((A) Arabidopsis, (B) fly, (C) mouse, and (D) yeast). Each of the panels is calculated and colored as in Figure 2C and shows that tendency to physically associate is strongest when the human gene pairs and the ortholog pairs are both strongly positively correlated in their expression.

**Supplemental Figure 2.** Direct measurement of DNA microarray cross-hybridization for removal of cross-hybridization-induced artifacts in the analysis of conserved co-expression. A microarray-based analysis of four yeast genes (YPL274W, YLR467W, YIR039C, and YKL224) reveals the relationship between DNA sequence identity and mRNA cross-hybridization on cDNA microarrays: when the DNA sequence identity between probe genes and homologous genes on the array is 70% or lower, the cross-hybridization is negligible. Adapted from (Carlson 2002).

**Supplemental Figure 3.** Reproducibility of sucrose gradient separations and mass spectrometry spectral counts abundance estimates. (A) BY4741 yeast cell lysate was prepared as described in Methods and fifteen OD260 units of the supernatant loaded onto three independent continuous 7% to 47% sucrose density gradients. After centrifuging for 2.5-hr at 40,000 rpm in a Beckman SW40 rotor, each of the three sucrose gradients was fractionated and absorbance at 254 nm was measured (ISCO fractionator). To correct for trivial shifts in the gradients, the resulting polysome profiles were aligned by correlation optimized warping (COW; available as open source Matlab code (Giorgio Tomasi 2004)). Average reproducibility of the gradients is high ( $\langle r \rangle \sim 1$  for the three gradients). (B) Two biological replicate HeLa S3 human cell culture whole cell lysates were prepared as in Methods, then trypsin digested and analyzed by tandem mass spectrometry as described in Methods, measuring the frequency of MS/MS spectral counts for each protein identified. The spectral frequencies observed in the two replicates both correlate well ( $r = 0.95$ , 543 proteins) and agree in absolute values, falling on the plot diagonal (solid line).

**Supplemental Figure 4.** Ribosomal protein mass spectrometry-based elution profiles are consistent with nucleic acid concentration profiles. The top panel indicates nucleic acid concentrations measured as absorbance at 254 nm across the cytosolic HeLa sucrose gradient fractionation of Figure 4, with locations of the 40S, 60S, 80S and polysomes marked. In the middle and bottom panels, specific protein elution profiles are plotted as measured by mass spectrometry. Elution profiles of known 40S and 60S ribosomal subunits (bottom panel) match those expected from the nucleic acid distributions; similarly, known 40S biogenesis factor BMS1 elutes with 40S cytosolic ribosomes; newly implicated 60S biogenesis factor BCCIP (ortholog of yeast BCP1; Figure 8) co-elutes with cytosolic ribosomal subunits.

**Supplemental Figure 5.** Proteasomal protein mass spectrometry-based elution profiles are consistent with Western blotting of independently fractionated biological replicate samples. Elution profiles measured by mass spectrometry (as in Methods, Figure 4) are plotted in the top panel for 3 proteasomal protein subunits. The profiles are generally consistent with those observed from a biological replicate HeLa cell sample, prepared in similar fashion, separated independently into cytosolic and nuclear/mitochondrial preparations and fractionated on replicate sucrose gradients, with proteins detected by Western blotting.

**Supplemental Figure 6.** Models of error for the accuracy benchmark based on yeast network path length. Results are plotted for replicate trials evaluating the accuracy of sets composed of known proportions of true and false positive associations (true positives are protein pairs known to belong to the same complexes from (Joshi-Tope et al. 2005); false positives are random associations chosen from the same set of proteins, omitting true positive associations). The test is performed as in Methods, employing YeastNet v. 2 (Lee et al. 2007), with all linkages derived exclusively from mRNA co-expression omitted. Each curve plots the mean  $\pm$  1 s.d. for 10 random selections of associations with the indicated percentage of true positives. These plots verify that the benchmark correctly estimates accuracy across the full range of values. The mean of the standard deviation of the random trials for all tested error rates (doubling the standard deviations

from tests of 0% and 100%, which fall at the accuracy boundaries) is 3.4 %, which we use to estimate the variation expected in measurements of other association sets using these benchmarks.

**Supplemental Figure 7.** The overall distribution of KOG functional annotations among the 2,348 unique proteins in the 7,000 conserved co-expression associations, measured using DAVID (Dennis et al. 2003). The number of proteins with each function is indicated around the perimeter; proteins for which only general function is known form the largest set, followed by proteins in post-translational modification, turnover, and folding.

**Supplemental Figure 8.** Statistical enrichment for specific protein functions and localizations among the 2,348 unique proteins in the 7,000 conserved co-expression associations, measured using DAVID (Dennis et al. 2003) and summarizing enrichment for specific Gene Ontology (A) biological processes, (B) cellular components, and (C) molecular functions. The plots indicate categories in each analysis that are enriched with  $p < 10^{-4}$ . Pie charts display the enriched categories ordered by the number of proteins in each of the significantly-enriched categories; histograms plot the corresponding  $p$ -values. In each pair of graphs (*i.e.*, in A, B or C), the same colors are used for the pie chart and histogram.

**Supplemental Figure 9.** Statistical enrichment for specific protein sequence families among the 2,348 unique proteins in the 7,000 conserved co-expression associations, measuring significantly enriched InterPro protein domain families using DAVID (Dennis et al. 2003). The pie chart and histogram represent the number of proteins in each domain family and the  $p$ -value associated with each domain family, respectively.

**Supplemental Figure 10.** (A) Histogram of BIOS scores for the 7,000 CCE associations. 4,354 (62%) of the 7,000 associations can be supported by at least one of the additional lines of evidence summarized in the BIOS score. (B) The LLR scores of CCE associations generally increase with increasing BIOS scores, although high-

confidence (high LLR) CCE associations are identified with no supporting BIOS evidence. The bottom, middle, and top horizontal lines of the box-and-whisker plots represent the 1st quartile, the median, and the 3rd quartile of AUCs, respectively; whiskers indicate 1.5 times the interquartile range. Symbols represent individual outliers.

## References

- Carlson, M.W. 2002. Surveying yeast genomic diversity using cDNA microarrays. In *Masters Thesis, Biomedical Engineering*, pp. 60. University of Texas, Austin.
- Dennis, G., Jr., B.T. Sherman, D.A. Hosack, J. Yang, W. Gao, H.C. Lane, and R.A. Lempicki. 2003. DAVID: Database for Annotation, Visualization, and Integrated Discovery. *Genome Biol* **4**: P3.
- Giorgio Tomasi, F.v.d.B.C.A. 2004. Correlation optimized warping and dynamic time warping as preprocessing methods for chromatographic data. *Journal of Chemometrics* **18**: 231-241.
- Joshi-Tope, G., M. Gillespie, I. Vastrik, P. D'Eustachio, E. Schmidt, B. de Bono, B. Jassal, G.R. Gopinath, G.R. Wu, L. Matthews, S. Lewis, E. Birney, and L. Stein. 2005. Reactome: a knowledgebase of biological pathways. *Nucleic Acids Res* **33 Database Issue**: D428-432.
- Lee, I., Z. Li, and E.M. Marcotte. 2007. An Improved, Bias-Reduced Probabilistic Functional Gene Network of Baker's Yeast, *Saccharomyces cerevisiae*. *PLoS ONE* **2**: e988.

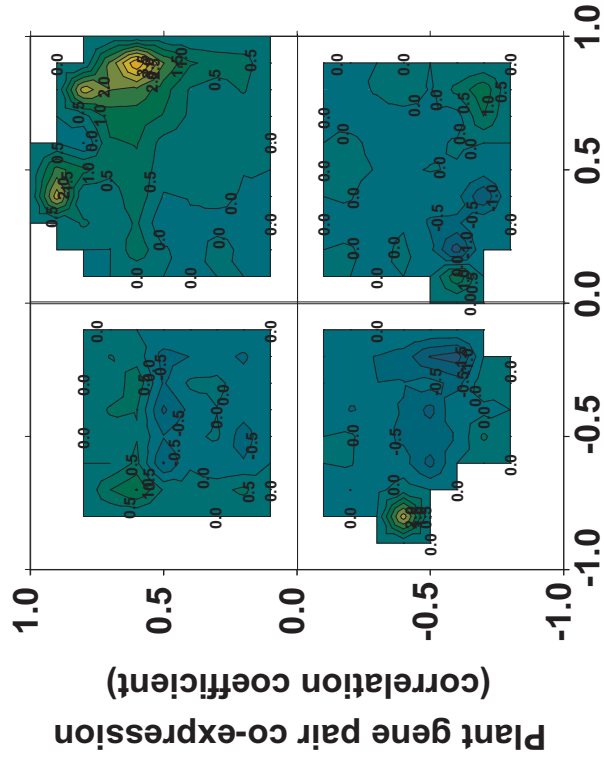

Human gene pair co-expression (correlation coefficient)

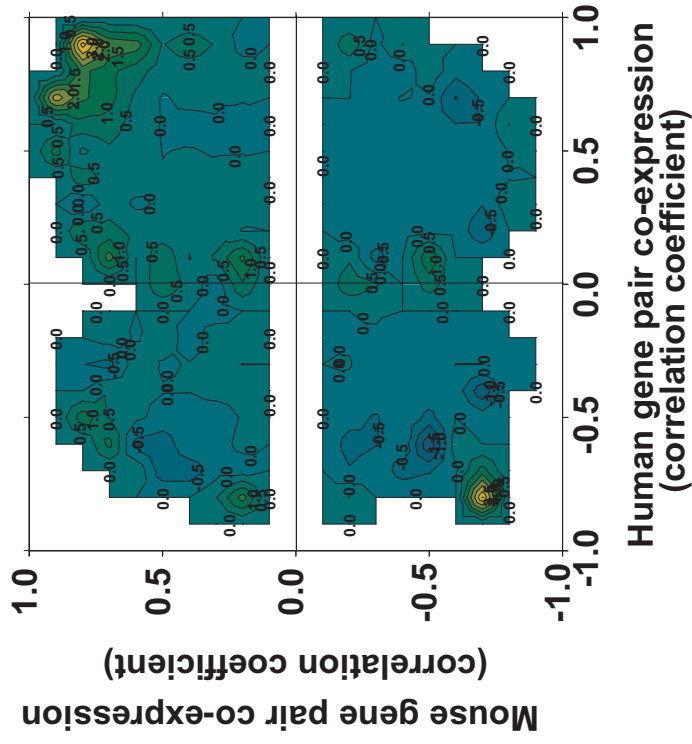

Human gene pair co-expression (correlation coefficient)

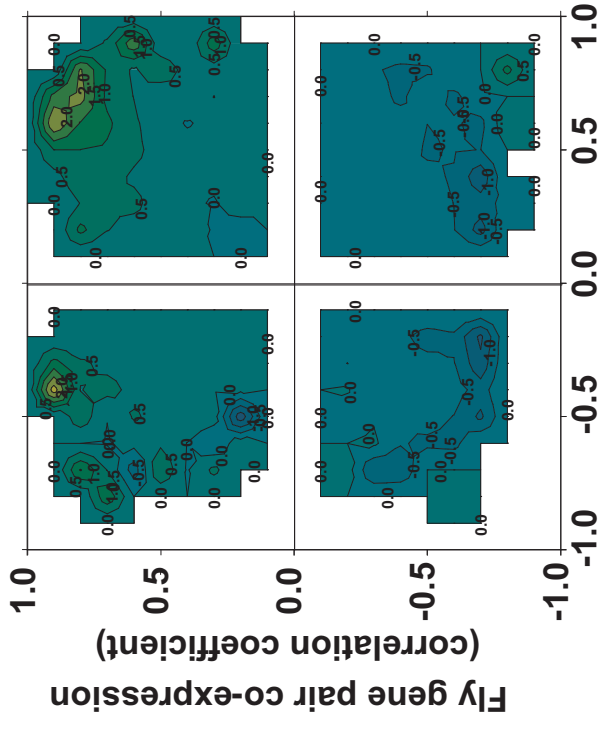

Human gene pair co-expression (correlation coefficient)

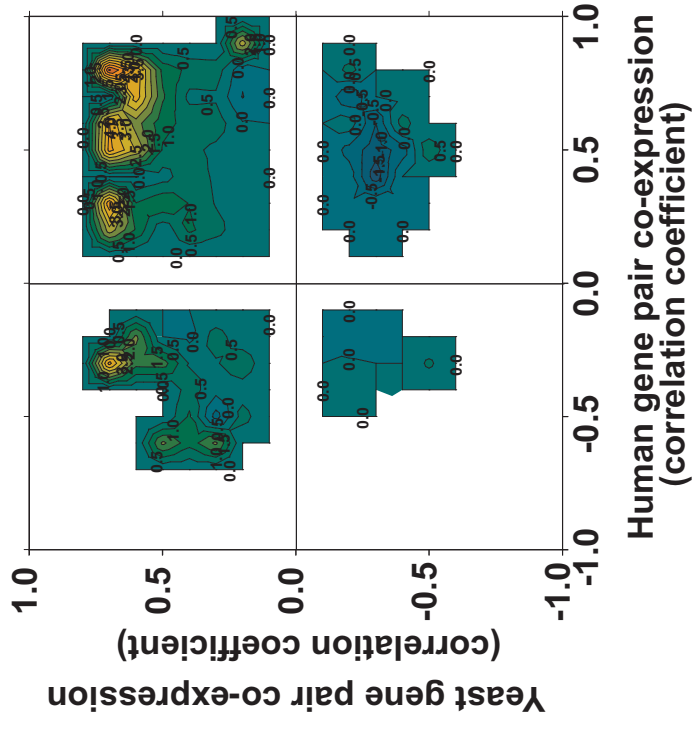

Human gene pair co-expression (correlation coefficient)

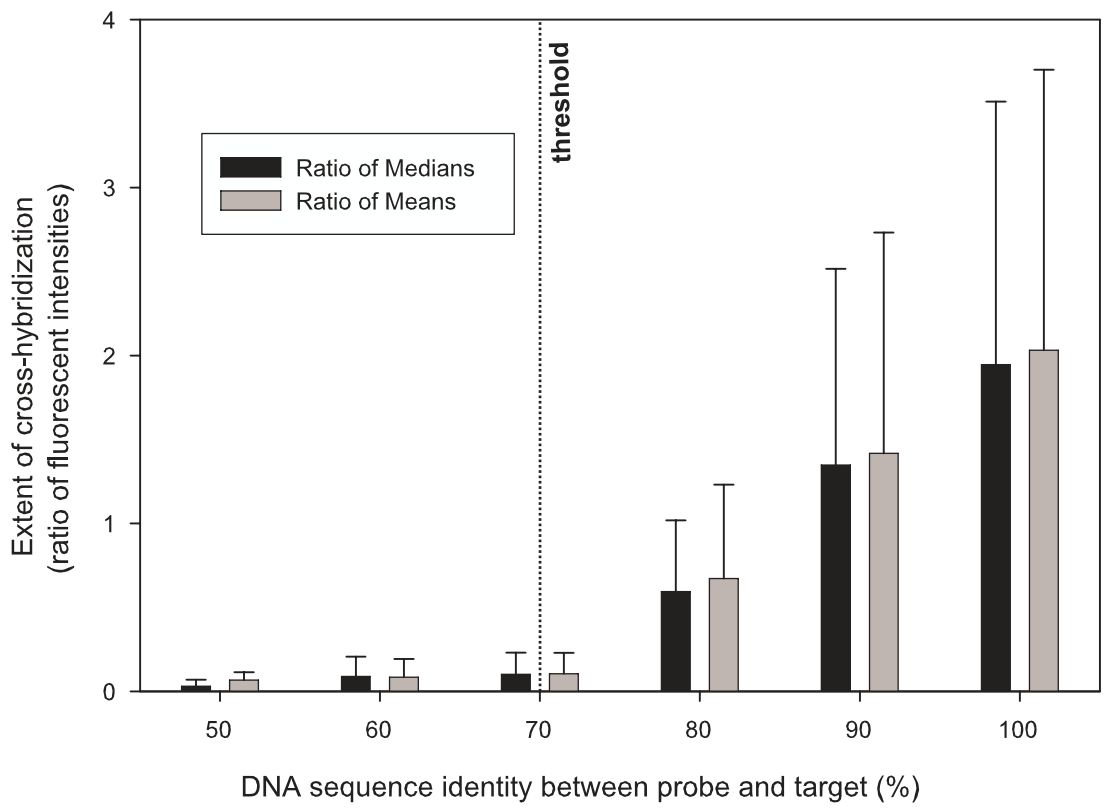

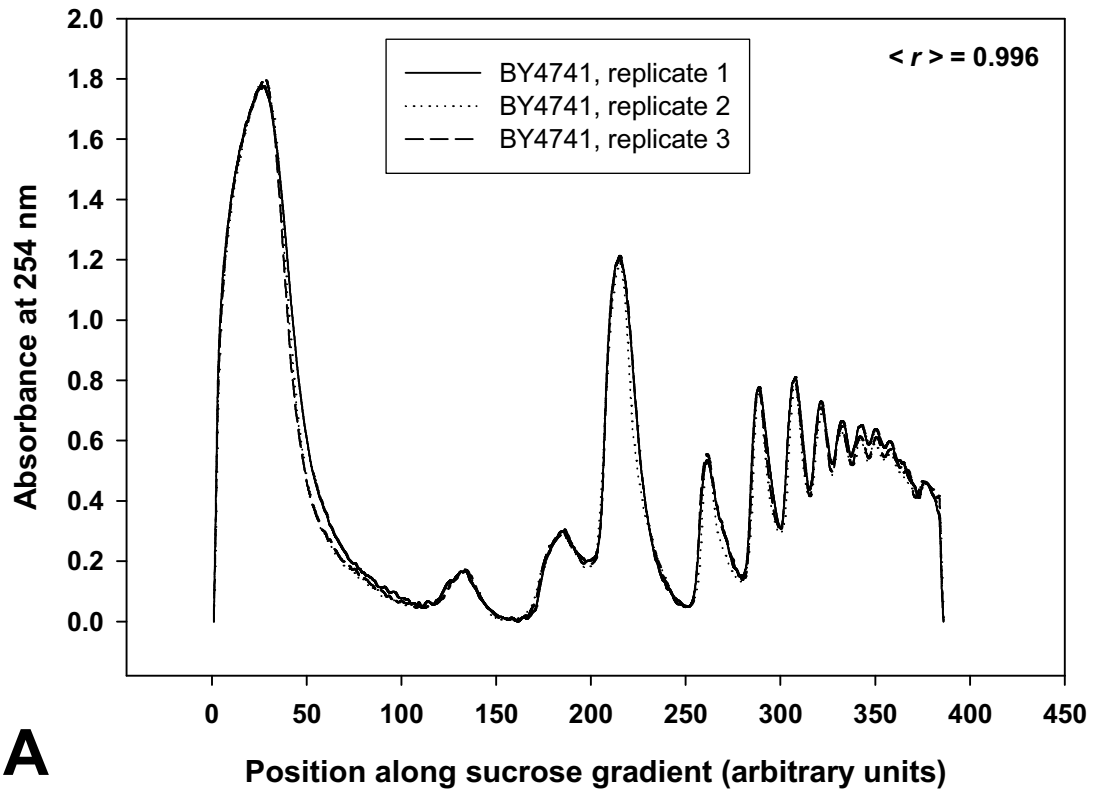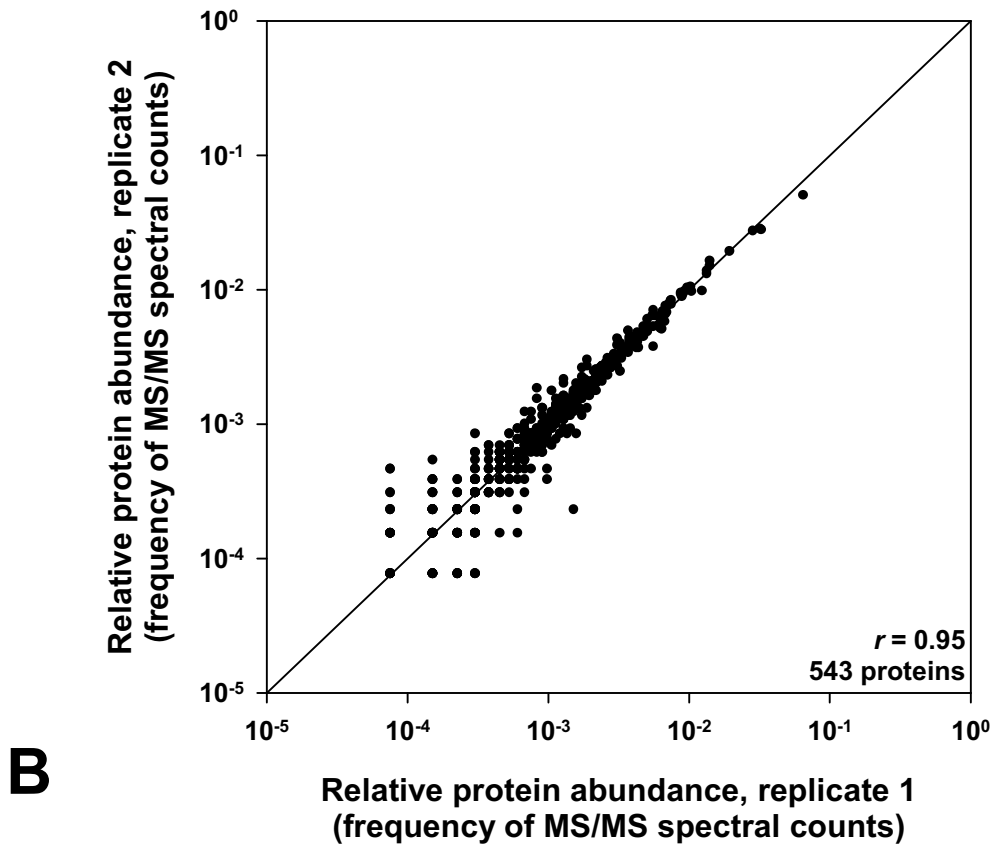

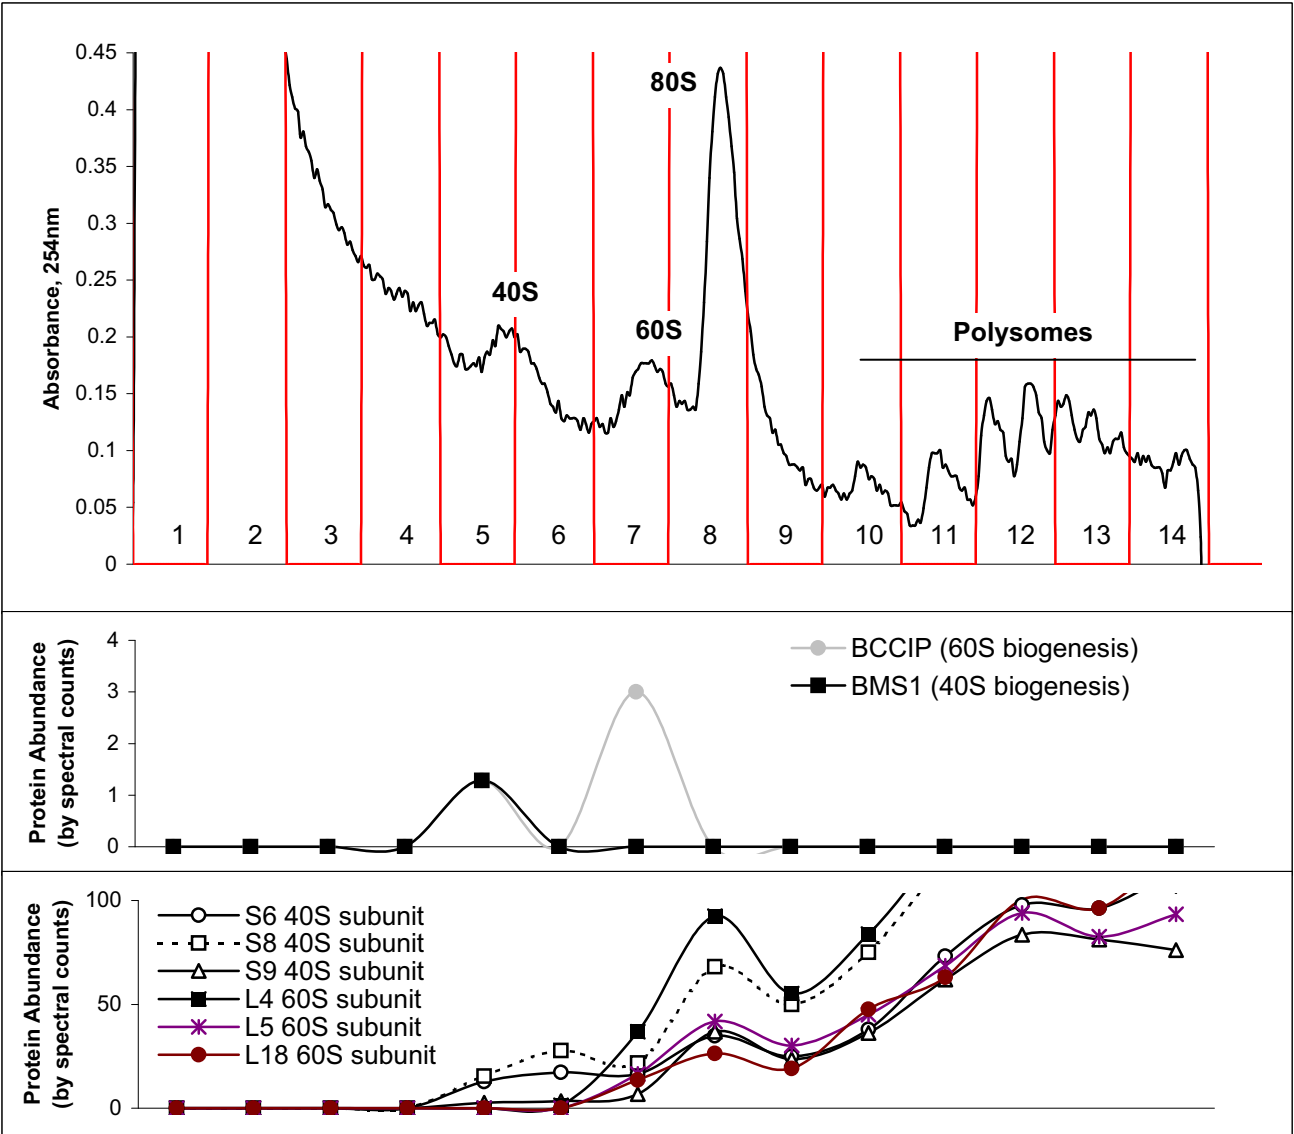



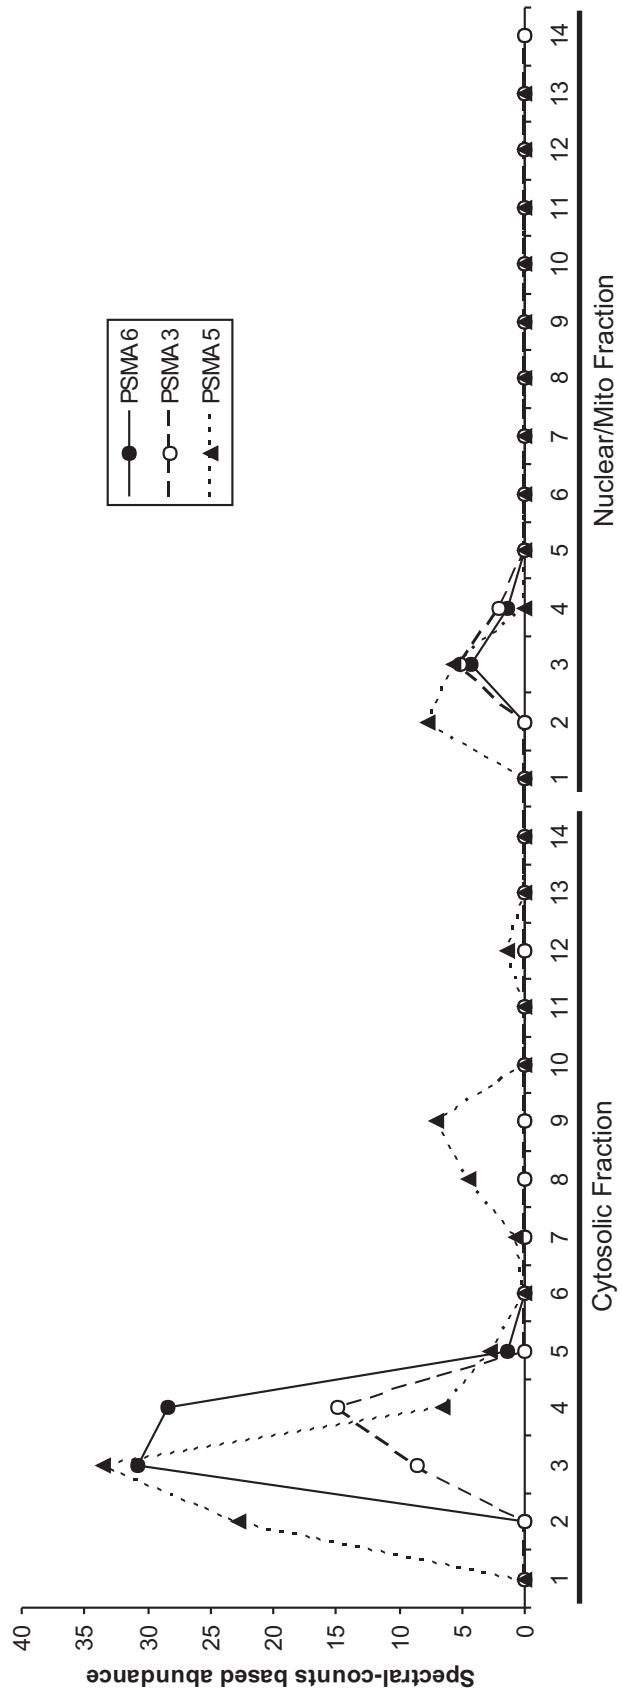

PSMA6  
 PSMA3  
 PSMA5

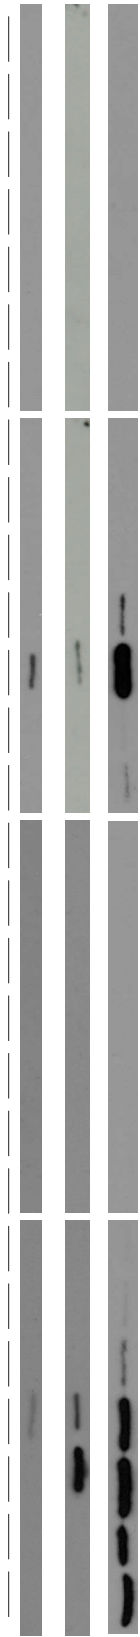

### Shortest pathlength between orthologs in yeast functional gene network

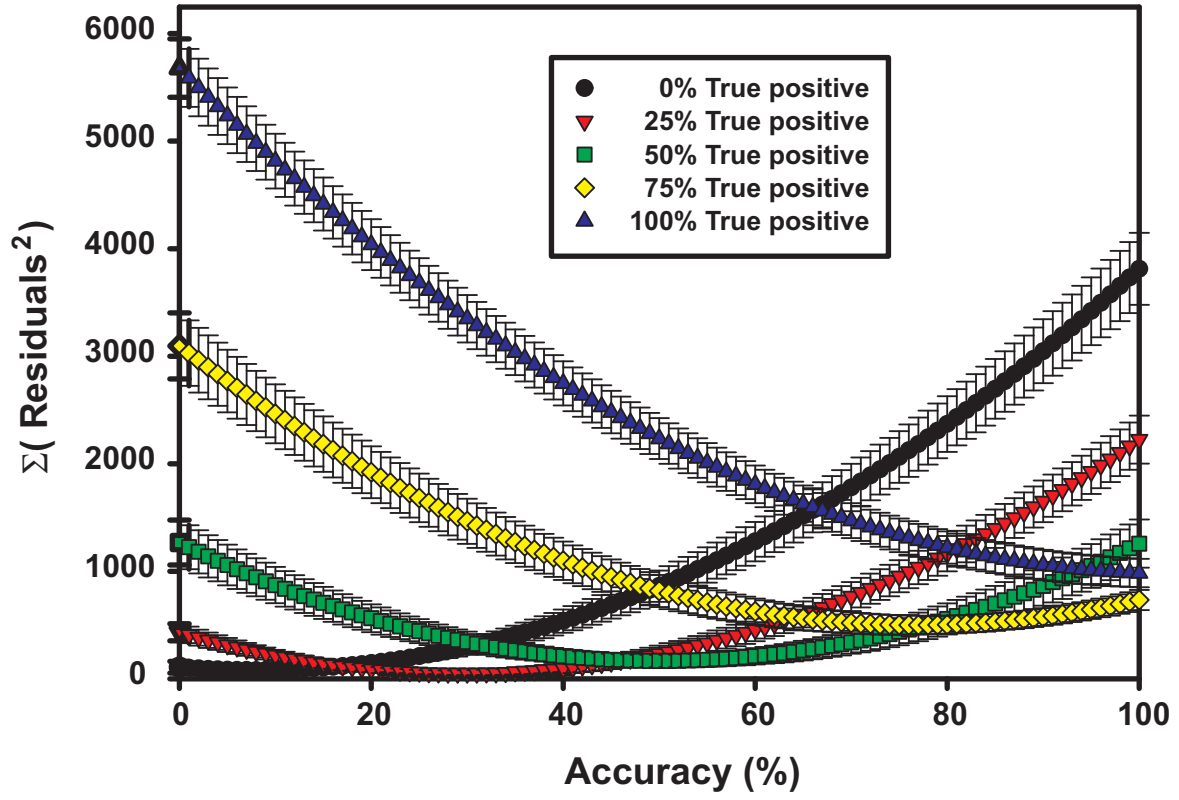

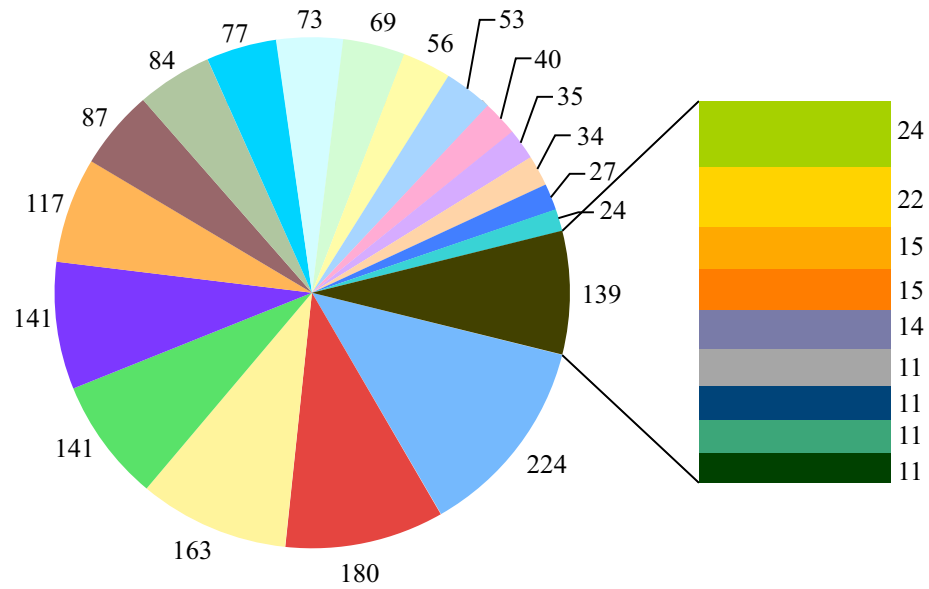

- General function prediction only
- Posttranslational modification, protein turnover, chaperones
- Signal transduction mechanisms
- Translation, Ribosome structure and biogenesis
- Transcription
- RNA processing and modification
- Function unknown
- Energy production and conversion
- Carbohydrate transport and metabolism
- Cytoskeleton
- Intracellular trafficking, secretion and vesicular transport
- Amino acid transport and metabolism
- Lipid transport and metabolism
- Inorganic ion transport and metabolism

- Replication, recombination and repair
- Cell cycle control, cell division, chromosome partitioning
- Chromatin structure and dynamics
- Nucleotide transport and metabolism
- Extracellular structures
- Secondary metabolites biosynthesis, transport and catabolism
- Lipid metabolism
- Cell division and chromosome partitioning
- Signal transduction mechanisms, general function prediction only
- Defense mechanisms
- Coenzyme transport and metabolism
- Signal transduction mechanisms, intracellular trafficking, secretion and vesicular transport
- Chromatin structure and dynamics, transport



### Interpro Domains

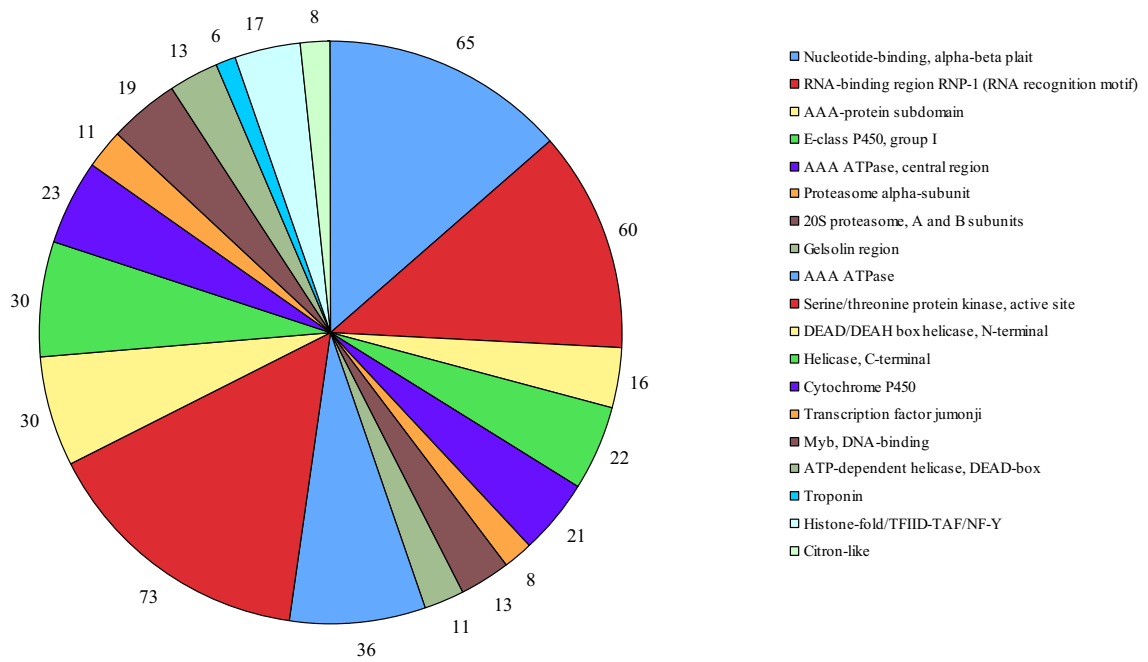

### Interpro Domains

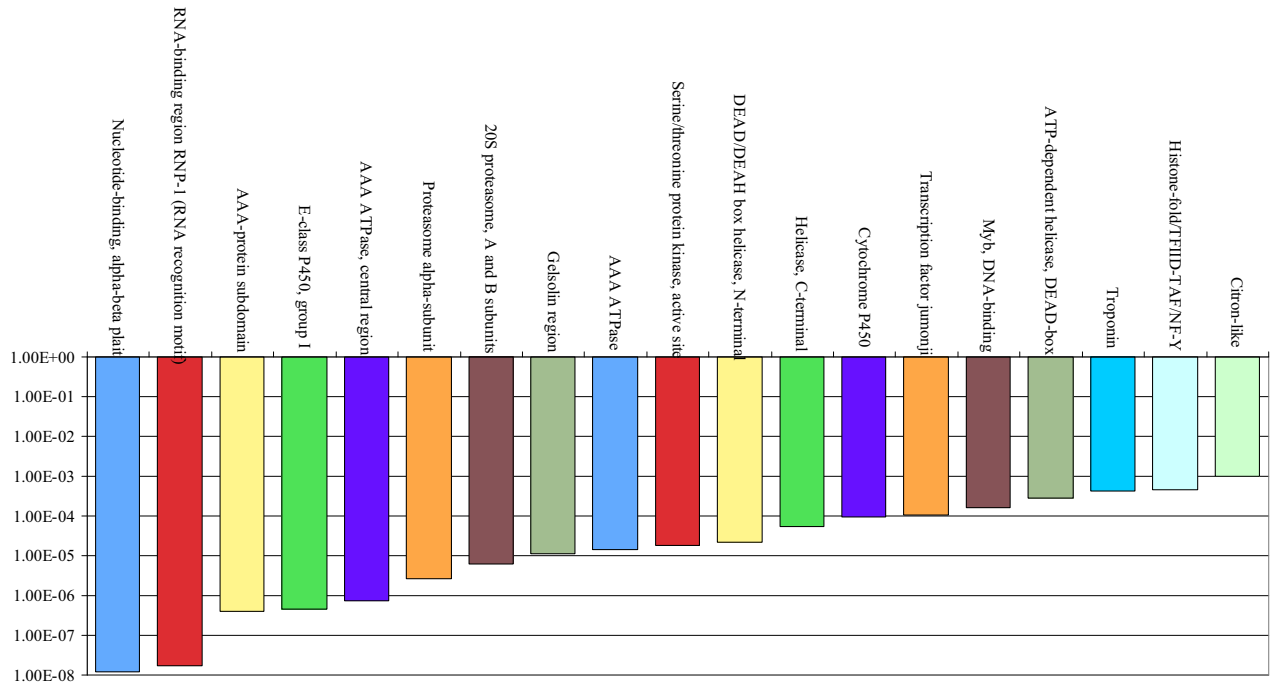

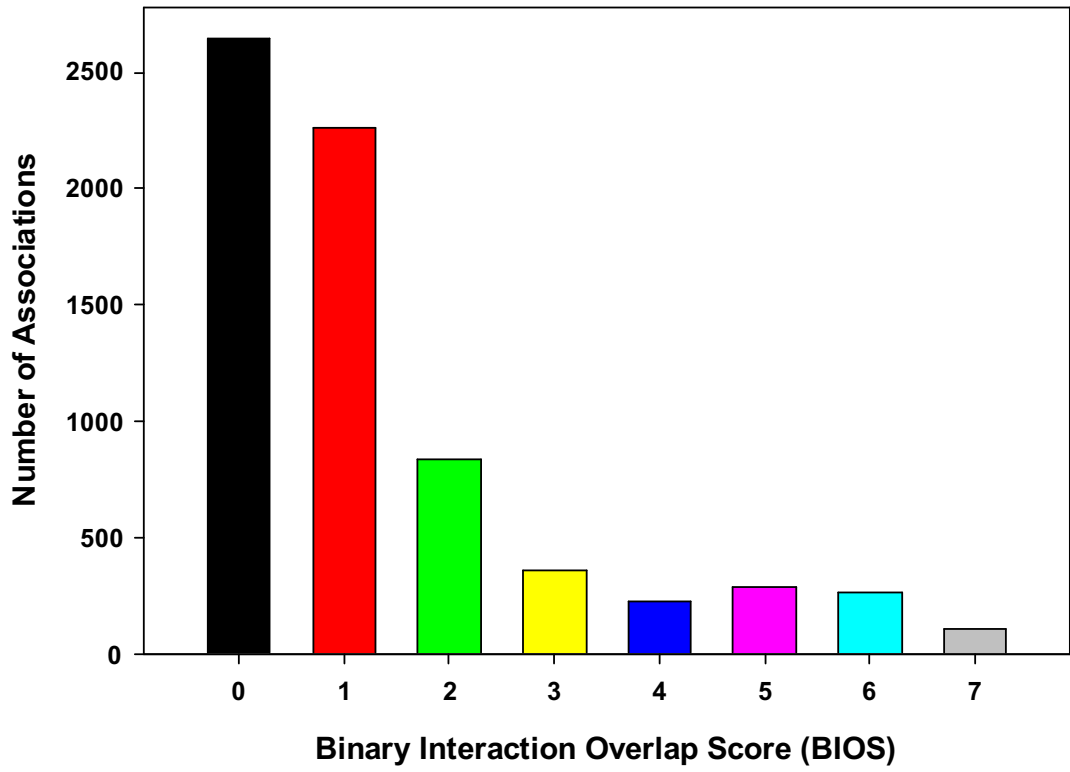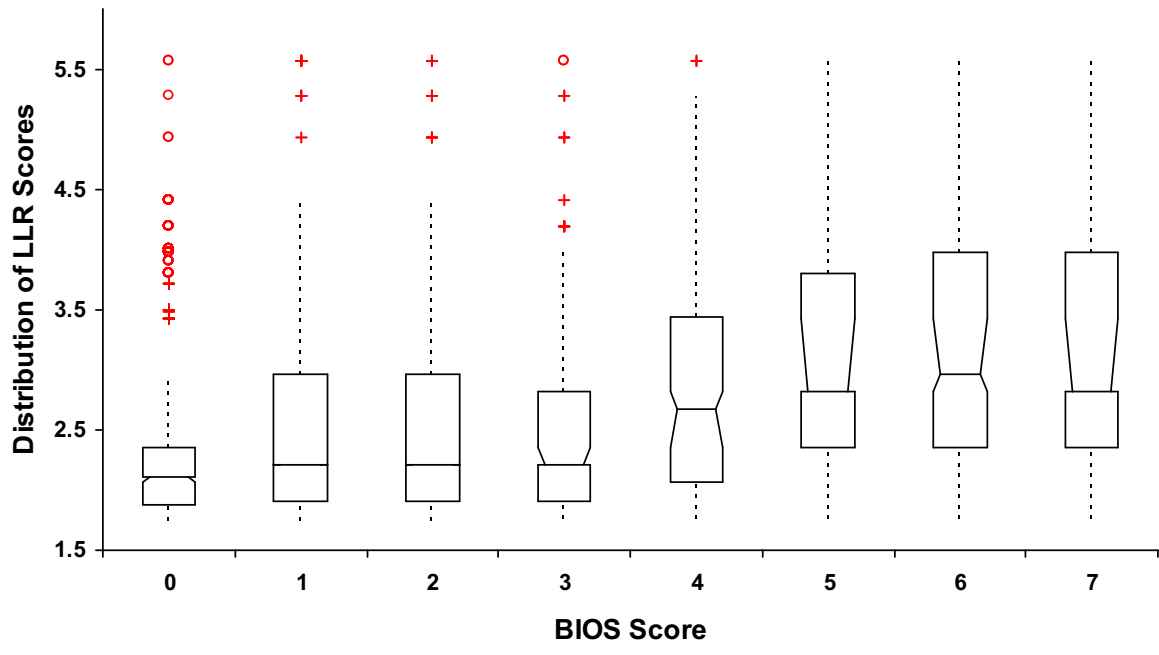

Supplement: msb200819-s1.pdf [file msb200819-s1.pdf]
