# Supplementary material for: A map of human protein interactions derived from co-expression of human mRNAs and their orthologs
Source: PubMed Central journal article supplement — Mol Syst Biol. 2008 Apr 15;4:180. doi: 10.1038/msb.2008.19 (PMC2387231; doi:10.1038/msb.2008.19), 2008-04-15
Supplement: msb200819-s2.pdf [file msb200819-s2.pdf]

**Supplemental Table 1.** Number of associations shared between pairs of protein interaction data sets. Assuming a complete interactome of 200,000 associations (i.e., ~10 unique associations each per 20,000 proteins), the 7,000 conserved co-expression associations show a statistically significant intersection ( $p < 10^{-43}$ ) with the Stuart *et al.* dataset. Assuming a smaller overall interactome of 120,000 associations, no datasets significantly overlap the 7,000 set. Each comparison significant at 95% confidence ( $p < 0.0018$  for 28 comparisons) is marked by an asterisk for the case of the complete interactome of size 200,000. Those significant assuming an interactome of 120K are marked by a dagger.

|                               | Ramani et al | Stuart et al | Stelzl et al | Rual et al | 7,000 conserved co-expression | Rhodes et al. | Ewing et al | OPHID  |
|-------------------------------|--------------|--------------|--------------|------------|-------------------------------|---------------|-------------|--------|
| Ramani et al                  | 31,609       |              |              |            |                               |               |             |        |
| Stuart et al                  | 1,620        | 15,000       |              |            |                               |               |             |        |
| Stelzl et al                  | 18           | 8            | 3,121        |            |                               |               |             |        |
| Rual et al                    | 95           | 5            | 9            | 2,754      |                               |               |             |        |
| 7,000 conserved co-expression | 859          | 848*         | 2            | 1          | 7,000                         |               |             |        |
| Rhodes et al.                 | 2,718        | 441          | 14           | 59         | 195                           | 38,379        |             |        |
| Ewing et al                   | 128          | 13           | 1            | 9          | 15                            | 56            | 4,670       |        |
| OPHID                         | 8,118        | 686          | 1,829*†      | 1,646*†    | 211                           | 2,286         | 2,461*†     | 57,507 |

**Supplemental Table 2.** Proportions of true physical associations measured for the CCE pairs and two control sets, using the methods of Figures 3 and 6 and an alternate gold standard positive association set derived from Ramani *et al.* (2005). Ranges of values are derived by comparison to the corresponding standard curves. Estimates of variance (+/- s.d.) for the path length method and ranges for the co-elution method are average values derived from analysis of control mixtures of known proportions of true and false positives.

|                                             | Percentage of true physical associations as measured by: |                                     |                 |                           |                           | Average of five tests (+/- s.d.) |
|---------------------------------------------|----------------------------------------------------------|-------------------------------------|-----------------|---------------------------|---------------------------|----------------------------------|
|                                             | Shotgun proteomics co-elution                            | Worm/fly/yeast physical interaction | GO/KEGG overlap | SwissProt keyword overlap | Yeast network path length |                                  |
| <b>7,000 conserved co-expression</b>        | 49 – 59                                                  | 53 – 64                             | 51 – 58         | 59 – 68                   | 76 +/- 3                  | 61 +/- 9                         |
| <b>Human-only co-expression (top 7,000)</b> | 18 – 28                                                  | 1 – 2                               | 1 – 3           | 12 – 22                   | 25 +/- 3                  | 14 +/- 11                        |
| <b>7,000 randomized</b>                     | 0 – 5                                                    | 4 – 10                              | 2 – 4           | 3 – 8                     | 5 +/- 3                   | 5 +/- 2                          |

**Supplemental Table 3.** Number of associations from the 7,000 conserved co-expression-derived association set whose strongest support (*i.e.*, maximum LLR score) derives from the given human-model organism datasets.

|                        | <i>A. thaliana</i> | <i>C. elegans</i> | <i>D. melanogaster</i> | <i>M. musculus</i> | <i>S. cerevisiae</i> |
|------------------------|--------------------|-------------------|------------------------|--------------------|----------------------|
| Number of associations | 1,079              | 2,949             | 1,244                  | 158                | 1,570                |

**Supplemental Table 4.** mRNA expression data used for conserved co-expression analysis. All 3,977 DNA microarray experiment datasets were obtained from the Stanford Microarray Database. The 1,922 experiments corresponding to the human microarrays were split into 11 general categories for analysis (as described in Methods); data for other organisms was treated as single categories.

| <b>Organism</b>        | <b>Category</b>  | <b>Number of Experiments</b> |
|------------------------|------------------|------------------------------|
| Human                  | Non-tumor tissue | 105                          |
| Human                  | Cell cycle       | 116                          |
| Human                  | Normal tissue    | 156                          |
| Human                  | Lymphoma         | 238                          |
| Human                  | Pathogen         | 330                          |
| Human                  | Primary tumor    | 527                          |
| Human                  | Breast cell line | 58                           |
| Human                  | Tissue rejection | 67                           |
| Human                  | T-cell           | 68                           |
| Human                  | Development      | 89                           |
| Human                  | Cell line        | 168                          |
| <i>A. thaliana</i>     | -                | 574                          |
| <i>C. elegans</i>      | -                | 553                          |
| <i>D. melanogaster</i> | -                | 170                          |
| <i>M. musculus</i>     | -                | 113                          |
| <i>S. cerevisiae</i>   | -                | 645                          |

**Supplemental Table 5.** Number of orthologs (more specifically, in-paralogs (Remm et al., 2001)) included in the analysis of conserved co-expression, derived from the InParanoid database with subsequent mapping of SwissProt gene identifiers to the organism-specific identifiers.

|       | <i>A. thaliana</i> | <i>C. elegans</i> | <i>D. melanogaster</i> | <i>M. musculus</i> | <i>S. cerevisiae</i> |
|-------|--------------------|-------------------|------------------------|--------------------|----------------------|
| Human | 5,820<br>4,393     | 5,867<br>6,773    | 5,898<br>7,570         | 10,357<br>10,378   | 2,142<br>3,513       |
